# Supplementary material for: Impact of Ge4+ Ion as Structural Dopant of Ti4+ in Anatase: Crystallographic Translation, Photocatalytic Behavior, and Efficiency under UV and VIS Irradiation
Source: Hindawi journal article supplement (doi:10.1155/2012/252894), 2012-01-01
Supplement: f1 [file 252894.f1.doc]

2. In supplementary material can be found results from HTXRD – diffractogram, phase composition, crystallite size and cell parameters. Furthermore are presented Raman shifts of series Ge doped samples, UV/Vis absorption spectra and band-gap energies, DTA-TG results, BET surface areas, pore size area distributions and the comparison of various titania for Orange II decomposition.
